# Supplementary material for: Application of “Magnetic Anchors” to Align Collagen Fibres for Axonal Guidance
Source: MDPI journal article supplement (doi:10.3390/gels7040154), 2021-09-27
Supplement: s1 [file s1]

Electronic Supplementary Information

# **Application of “Magnetic Anchors” to Align Collagen Fibres for Axonal Guidance**

**Devindraan S/O Sirkkunan, Farina Muhamad \* and Belinda Pinguang-Murphy**

Department of Biomedical Engineering, Faculty of Engineering, Universiti Malaya, Kuala Lumpur 50603,

Malaysia; ezvn2066@gmail.com (D.S.); bpingguan@gmail.com (B.P.-M.)

\* Correspondence: farinamuhamad@um.edu.my

**Table S1.** The different groups of collagen scaffold fabrication methods compared and their corresponding constituents summarized in this table.

| Scaffold Types                                                                           | Constituents of Complete Collagen Solution                                                                                                                              |                                                                                                       |                                                                                                                                                     | Final Fabrication Procedure                                                                                                                                                                                                         |
|------------------------------------------------------------------------------------------|-------------------------------------------------------------------------------------------------------------------------------------------------------------------------|-------------------------------------------------------------------------------------------------------|-----------------------------------------------------------------------------------------------------------------------------------------------------|-------------------------------------------------------------------------------------------------------------------------------------------------------------------------------------------------------------------------------------|
| Plain Collagen                                                                           | 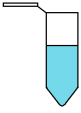<br>Collagen (833 $\mu$ l) +<br>10 $\times$ PBS (100 $\mu$ l) +<br>NaOH (21 $\mu$ l)   | dH <sub>2</sub> O (46 $\mu$ l)/~46,000<br>PC12 Cells in<br>RPMI1640<br>culture<br>medium (46 $\mu$ l) |                                                                                                                                                     | <br>Complete collagen solution<br>pipetted on mould before<br>solidification into collagen<br>scaffolds                                          |
| GMNP incorporated collagen scaffolds without magnetic field treatment                    | <br>Collagen (833 $\mu$ l) +<br>10 $\times$ PBS (100 $\mu$ l) +<br>NaOH (21 $\mu$ l)   | dH <sub>2</sub> O (46 $\mu$ l)/~46,000<br>PC12 Cells in<br>RPMI1640<br>culture<br>medium (46 $\mu$ l) | <br>GMNP (0.506 mg)                                               | <br>Complete collagen solution<br>pipetted on mould before<br>solidification into collagen<br>scaffolds                                          |
| Scaffolds fabricated with the “magnetic particle string” method                          | <br>Collagen (833 $\mu$ l) +<br>10 $\times$ PBS (100 $\mu$ l) +<br>NaOH (21 $\mu$ l)  | dH <sub>2</sub> O (46 $\mu$ l)/~46,000<br>PC12 Cells in<br>RPMI1640<br>culture<br>medium (46 $\mu$ l) | <br>GMNP (0.506 mg)                                              | <br>Complete collagen solution<br>was pipetted on moulds<br>within a magnetic field set<br>up before solidification into<br>collagen scaffolds  |
| CMP functionalized GMNP incorporated collagen scaffolds without magnetic field treatment | <br>Collagen (833 $\mu$ l) +<br>10 $\times$ PBS (100 $\mu$ l) +<br>NaOH (21 $\mu$ l) | dH <sub>2</sub> O (46 $\mu$ l)/~46,000<br>PC12 Cells in<br>RPMI1640<br>culture<br>medium (46 $\mu$ l) | <br>GMNPs (0.505 mg)<br>functionalized with<br>CMPs (0.0575 mg) | <br>Complete collagen solution<br>pipetted on mould before<br>solidification into collagen<br>scaffolds                                        |
| Scaffolds fabricated with the “magnetic anchor” method                                   | <br>Collagen (833 $\mu$ l) +<br>10 $\times$ PBS (100 $\mu$ l) +<br>NaOH (21 $\mu$ l) | dH <sub>2</sub> O (46 $\mu$ l)/~46,000<br>PC12 Cells in<br>RPMI1640<br>culture<br>medium (46 $\mu$ l) | <br>GMNPs (0.505 mg)<br>functionalized with<br>CMPs (0.0575 mg) | <br>Complete collagen solution<br>was pipetted on moulds<br>within a magnetic field set<br>up before solidification into<br>collagen scaffolds |

**Table S2.** The angle of deviation from the mean of all the PC12 neurites of the different groups of scaffolds compared in this study. 25 cells were chosen from each scaffold and their neurite's angle of deviation from the mean is shown here.

| Scaffolds faricated with the "magnetic particle string" method angle of deviation from mean (°) | CMP functionalized GMNP scaffolds without magnetic field treatment angle of deviation from mean (°) | Scaffolds Fabricated with the "magnetic anchor" method angle of deviation from mean (°) |
|-------------------------------------------------------------------------------------------------|-----------------------------------------------------------------------------------------------------|-----------------------------------------------------------------------------------------|
| 6.943                                                                                           | 0.01222                                                                                             | 17.1686                                                                                 |
| 10.147                                                                                          | 0.82778                                                                                             | 9.1114                                                                                  |
| 20.583                                                                                          | 3.17222                                                                                             | 13.3486                                                                                 |
| 7.697                                                                                           | 4.05778                                                                                             | 5.2814                                                                                  |
| 43.957                                                                                          | 12.30778                                                                                            | 16.9814                                                                                 |
| 75.983                                                                                          | 15.33222                                                                                            | 22.2886                                                                                 |
| 65.303                                                                                          | 24.79778                                                                                            | 111.6814                                                                                |
| 19.863                                                                                          | 27.16222                                                                                            | 21.6386                                                                                 |
| 72.787                                                                                          | 27.20222                                                                                            | 10.7886                                                                                 |
| 60.213                                                                                          | 34.13778                                                                                            | 2.1086                                                                                  |
| 44.933                                                                                          | 35.55222                                                                                            | 18.8386                                                                                 |
| 95.987                                                                                          | 36.6878                                                                                             | 19.3086                                                                                 |
| 95.987                                                                                          | 39.64222                                                                                            | 17.2086                                                                                 |
| 73.353                                                                                          | 40.40778                                                                                            | 13.6486                                                                                 |
| 63.117                                                                                          | 40.45222                                                                                            | 51.2186                                                                                 |
| 51.857                                                                                          | 41.03222                                                                                            | 9.0486                                                                                  |
| 76.617                                                                                          | 42.71778                                                                                            | 13.0286                                                                                 |
| 48.423                                                                                          | 43.78222                                                                                            | 50.1186                                                                                 |
| 42.737                                                                                          | 44.36778                                                                                            | 25.2814                                                                                 |
| 9.723                                                                                           | 49.90222                                                                                            | 33.6286                                                                                 |
| 33.823                                                                                          | 50.52778                                                                                            | 10.1486                                                                                 |
| 19.307                                                                                          | 50.81778                                                                                            | 17.1586                                                                                 |
| 8.363                                                                                           | 52.60222                                                                                            | 5.0914                                                                                  |
| 1.513                                                                                           | 52.80778                                                                                            | 16.7714                                                                                 |
| 17.293                                                                                          | 53.22778                                                                                            | 7.6214                                                                                  |
| 80.676                                                                                          | 54.50222                                                                                            | 2.5986                                                                                  |
| 2.617                                                                                           | 57.55778                                                                                            | 16.4486                                                                                 |
| 14.417                                                                                          | 58.49778                                                                                            | 26.1514                                                                                 |
| 64.157                                                                                          | 61.32222                                                                                            | 0.6486                                                                                  |
| 49.903                                                                                          | 61.65222                                                                                            | 22.4814                                                                                 |
| 58.303                                                                                          | 63.90778                                                                                            | 19.0314                                                                                 |
| 67.617                                                                                          | 67.58222                                                                                            | 6.1014                                                                                  |
| 24.973                                                                                          | 67.75222                                                                                            | 18.1586                                                                                 |
| 54.863                                                                                          | 68.40222                                                                                            | 32.8214                                                                                 |
| 77.323                                                                                          | 68.73222                                                                                            | 4.7086                                                                                  |
| 86.327                                                                                          | 69.04222                                                                                            | 19.1314                                                                                 |
| 23.437                                                                                          | 70.06222                                                                                            | 3.4886                                                                                  |

|        |          |         |
|--------|----------|---------|
| 46.593 | 70.08778 | 16.9814 |
| 73.973 | 71.26222 | 21.1914 |
| 73.343 | 71.91778 | 15.1514 |
| 84.487 | 72.22222 | 6.6414  |
| 58.117 | 73.29778 | 32.2014 |
| 59.317 | 73.34778 | 28.8386 |
| 10.873 | 73.36222 | 0.1186  |
| 7.497  | 74.43222 |         |
| 60.813 | 76.01222 |         |
| 24.653 | 77.37778 |         |
| 10.557 | 79.63222 |         |
| 19.703 | 83.58778 |         |
| 53.527 | 84.18778 |         |
|        | 85.40778 |         |
|        | 89.43778 |         |
|        | 94.63778 |         |
|        | 97.76778 |         |

**Table S3.** The number of neurites and its average angle of deviation from the mean for the different group of scaffolds compared in this study. The number of neurites and angle of deviation from the mean represented in this table is an average from the 25 cells chosen from each scaffold types.

|                                          | Scaffolds fabricated with the "magnetic particle string" method | CMP functionalized GMNP collagen scaffolds without magnetic field treatment | Scaffolds fabricated with the "magnetic anchor" method |
|------------------------------------------|-----------------------------------------------------------------|-----------------------------------------------------------------------------|--------------------------------------------------------|
| Number on neurites per 25 cells          | 49                                                              | 53                                                                          | 43                                                     |
| Average angle of deviation from mean (°) | 45.0915                                                         | 54.45426                                                                    | 18.89572                                               |

**Table S4.** The angle and probability density function of every neurites from the scaffolds compared this study.

| Scaffolds faricated with the "magnetic particle string" method |                              | CMP functionalized GMNP scaffolds without magnetic field treatment |                              | Scaffolds Fabricated with the "magnetic anchor" method |                              |
|----------------------------------------------------------------|------------------------------|--------------------------------------------------------------------|------------------------------|--------------------------------------------------------|------------------------------|
| Angle (°)                                                      | Probability Density Function | Angle (°)                                                          | Probability Density Function | Angle (°)                                              | Probability Density Function |
| 6.69                                                           | 0.002552                     | 1.68                                                               | 0.001746                     | 17.1                                                   | 1.68E-06                     |
| 8.03                                                           | 0.00265                      | 4.81                                                               | 0.0019                       | 95.96                                                  | 0.006942                     |
| 10.04                                                          | 0.002801                     | 10.01                                                              | 0.002173                     | 96.58                                                  | 0.007149                     |
| 10.66                                                          | 0.002848                     | 14.04                                                              | 0.0024                       | 102.63                                                 | 0.009253                     |
| 10.67                                                          | 0.002849                     | 15.26                                                              | 0.00247                      | 103.5                                                  | 0.00956                      |
| 18.71                                                          | 0.003495                     | 15.86                                                              | 0.002506                     | 106.3                                                  | 0.010541                     |
| 23.2                                                           | 0.003878                     | 22.07                                                              | 0.002883                     | 107.59                                                 | 0.010984                     |
| 23.8                                                           | 0.00393                      | 26.1                                                               | 0.00314                      | 109.65                                                 | 0.011671                     |
| 25.71                                                          | 0.004096                     | 26.15                                                              | 0.003144                     | 109.75                                                 | 0.011704                     |
| 29.15                                                          | 0.004399                     | 27.53                                                              | 0.003233                     | 111.8                                                  | 0.012353                     |
| 33.37                                                          | 0.004774                     | 29.36                                                              | 0.003354                     | 111.8                                                  | 0.012353                     |
| 34.11                                                          | 0.004839                     | 35.54                                                              | 0.003767                     | 112.01                                                 | 0.012417                     |
| 35.59                                                          | 0.00497                      | 41.89                                                              | 0.004199                     | 113.63                                                 | 0.012895                     |
| 37.42                                                          | 0.005131                     | 46.22                                                              | 0.004491                     | 119.67                                                 | 0.014352                     |
| 39.08                                                          | 0.005276                     | 46.64                                                              | 0.00452                      | 121.16                                                 | 0.014616                     |
| 50.19                                                          | 0.006194                     | 48.63                                                              | 0.004653                     | 122.14                                                 | 0.014766                     |
| 59.04                                                          | 0.006815                     | 48.92                                                              | 0.004672                     | 122.68                                                 | 0.01484                      |
| 59.36                                                          | 0.006835                     | 55.08                                                              | 0.005072                     | 123.5                                                  | 0.014942                     |
| 63.43                                                          | 0.007069                     | 56.73                                                              | 0.005175                     | 123.69                                                 | 0.014963                     |
| 64.15                                                          | 0.007107                     | 59.04                                                              | 0.005317                     | 128.9                                                  | 0.015249                     |
| 64.31                                                          | 0.007115                     | 62.76                                                              | 0.005535                     | 129.43                                                 | 0.015245                     |
| 66.72                                                          | 0.007233                     | 65.31                                                              | 0.005678                     | 130.89                                                 | 0.0152                       |
| 73.14                                                          | 0.007477                     | 74.65                                                              | 0.006134                     | 131.38                                                 | 0.015174                     |
| 74.29                                                          | 0.007509                     | 87.14                                                              | 0.006547                     | 132.27                                                 | 0.015114                     |
| 75.65                                                          | 0.007543                     | 95.39                                                              | 0.006672                     | 133.49                                                 | 0.015004                     |
| 77.07                                                          | 0.007573                     | 98.62                                                              | 0.006687                     | 137.83                                                 | 0.014364                     |
| 82.5                                                           | 0.007637                     | 99.46                                                              | 0.006688                     | 138.93                                                 | 0.014144                     |
| 86.63                                                          | 0.007631                     | 102.62                                                             | 0.006678                     | 139.57                                                 | 0.014006                     |
| 91.51                                                          | 0.007562                     | 114.78                                                             | 0.00647                      | 141.81                                                 | 0.013471                     |
| 91.71                                                          | 0.007558                     | 126.55                                                             | 0.006032                     | 142.13                                                 | 0.013388                     |
| 94.16                                                          | 0.007498                     | 126.61                                                             | 0.006029                     | 142.43                                                 | 0.013309                     |
| 94.57                                                          | 0.007486                     | 135                                                                | 0.0056                       | 145.23                                                 | 0.012514                     |
| 98.43                                                          | 0.007355                     | 139.09                                                             | 0.005314                     | 145.94                                                 | 0.012298                     |
| 103.32                                                         | 0.007136                     | 139.9                                                              | 0.005314                     | 145.95                                                 | 0.012295                     |
| 107.45                                                         | 0.006908                     | 140.48                                                             | 0.005279                     | 145.99                                                 | 0.012283                     |
| 126.75                                                         | 0.005466                     | 143.23                                                             | 0.005109                     | 146.94                                                 | 0.011985                     |
| 127.97                                                         | 0.005361                     | 149.35                                                             | 0.004713                     | 147.62                                                 | 0.011767                     |

|        |          |  |        |          |  |        |          |
|--------|----------|--|--------|----------|--|--------|----------|
| 135.87 | 0.004666 |  | 152.05 | 0.004533 |  | 148.09 | 0.011614 |
| 137.54 | 0.004518 |  | 153.95 | 0.004406 |  | 150.42 | 0.010832 |
| 142.13 | 0.004112 |  | 157.94 | 0.004135 |  | 151.07 | 0.010608 |
| 143.33 | 0.004008 |  | 160.77 | 0.003943 |  | 157.62 | 0.008306 |
| 147.13 | 0.00368  |  | 161.1  | 0.00392  |  | 162.41 | 0.006675 |
| 148.17 | 0.003592 |  | 167.03 | 0.00352  |  | 178.9  | 0.002434 |
| 151.63 | 0.003303 |  | 167.2  | 0.003509 |  | 180    | 0.002243 |
| 156.8  | 0.002892 |  | 167.85 | 0.003465 |  |        |          |
| 160.63 | 0.002604 |  | 168.18 | 0.003443 |  |        |          |
| 168.5  | 0.002063 |  | 168.49 | 0.003423 |  |        |          |
| 170.34 | 0.001948 |  | 169.51 | 0.003355 |  |        |          |
| 180    | 0.00141  |  | 170.71 | 0.003276 |  |        |          |
| 180    | 0.00141  |  | 171.67 | 0.003214 |  |        |          |
|        |          |  | 172.81 | 0.003139 |  |        |          |
|        |          |  | 173.88 | 0.00307  |  |        |          |
|        |          |  | 175.46 | 0.00297  |  |        |          |
|        |          |  | 179.08 | 0.002744 |  |        |          |

**Table S5.** The analysis of the data for angle and probability density function of the PC12 neurites from the different scaffolds compared for ANOVA.

| Treatment →                                          | Scaffolds faricated with the "magnetic particle string" method | CMP functionalized GMNP scaffolds without magnetic field treatment | Scaffolds Fabricated with the "magnetic anchor" method | Pooled Total |
|------------------------------------------------------|----------------------------------------------------------------|--------------------------------------------------------------------|--------------------------------------------------------|--------------|
| observations N                                       | 50                                                             | 54                                                                 | 44                                                     | 148          |
| sum $\sum x_i \sum x_i$                              | 2254.58                                                        | 2940.53                                                            | 831.4116                                               | 6026.52      |
| mean $\bar{x}$                                       | 45.0915                                                        | 54.4543                                                            | 18.8957                                                | 40.7197      |
| sum of squares $\sum x_i^2 - \frac{(\sum x_i)^2}{N}$ | 140,262.40                                                     | 192,161.00                                                         | 30,114.03                                              | 362,537.44   |
| sample variance $s^2$                                | 787.7599                                                       | 604.4644                                                           | 334.9748                                               | 796.867      |
| sample std. dev. $s$                                 | 28.0671                                                        | 24.5859                                                            | 18.3023                                                | 28.2288      |
| std. dev. of mean $SE_{\bar{x}}$                     | 3.9693                                                         | 3.3457                                                             | 2.7592                                                 | 2.3204       |

**Table S6.** The Tukey post hoc test of the ANOVA test performed for data for angle and probability density function of the PC12 neurites.

| treatments                                                                                                                           | Tukey HSD   | Tukey HSD | Tukey HSD     |
|--------------------------------------------------------------------------------------------------------------------------------------|-------------|-----------|---------------|
| pair                                                                                                                                 | Q statistic | p-value   | inference     |
| Scaffolds faricated with the "magnetic particle string" method vs CMP functionalized GMNP scaffolds without magnetic field treatment | 2.7858      | 0.1235283 | insignificant |
| Scaffolds faricated with the "magnetic particle string" method vs Scaffolds Fabricated with the "magnetic anchor" method             | 7.4006      | 0.0010053 | ** p<0.01     |
| CMP functionalized GMNP scaffolds without magnetic field treatment vs Scaffolds Fabricated with the "magnetic anchor" method         | 10.2244     | 0.0010053 | ** p<0.01     |

**Table S7.** The analysis of the data for Live/Dead, percentage of live cells within the different scaffolds compared for ANOVA.

| Treatment →                                          | Collagen scaffolds fabricated using conventional method | Scaffolds faricated with the "magnetic particle string" method without magnetic field treatment | Scaffolds faricated with the "magnetic particle string" method | CMP functionalized GMNP scaffolds without magnetic field treatment | Scaffolds Fabricated with the "magnetic anchor" method | Pooled Total |
|------------------------------------------------------|---------------------------------------------------------|-------------------------------------------------------------------------------------------------|----------------------------------------------------------------|--------------------------------------------------------------------|--------------------------------------------------------|--------------|
| observations N                                       | 2                                                       | 2                                                                                               | 2                                                              | 2                                                                  | 2                                                      | 10           |
| sum $\sum x_i \sum x_i$                              | 156.4                                                   | 154.9                                                                                           | 153.5                                                          | 176.5                                                              | 170.2                                                  | 811.5        |
| mean $\bar{x}$                                       | 78.2                                                    | 77.45                                                                                           | 76.75                                                          | 88.25                                                              | 85.1                                                   | 81.15        |
| sum of squares $\sum x_i^2 - \frac{(\sum x_i)^2}{N}$ | 12,230.80                                               | 12,019.45                                                                                       | 11,810.77                                                      | 15,582.25                                                          | 14,505.80                                              | 66,149.07    |
| sample variance $s^2$                                | 0.32                                                    | 22.445                                                                                          | 29.645                                                         | 6.125                                                              | 21.78                                                  | 32.8717      |
| sample std. dev. $s$                                 | 0.5657                                                  | 4.7376                                                                                          | 5.4447                                                         | 2.4749                                                             | 4.6669                                                 | 5.7334       |

|                                              |     |      |      |      |     |        |
|----------------------------------------------|-----|------|------|------|-----|--------|
| std. dev. of mean<br>SE $\times$ SE $\times$ | 0.4 | 3.35 | 3.85 | 1.75 | 3.3 | 1.8131 |
|----------------------------------------------|-----|------|------|------|-----|--------|

**Table S8.** The Tukey post hoc test of the ANOVA test performed for percentage of live cells within the different scaffolds compared

| treatments pair                                                                                                                                                   | Tukey HSD<br>Q statistic | Tukey HSD<br><i>p</i> -value | Tukey HSD<br>inference |
|-------------------------------------------------------------------------------------------------------------------------------------------------------------------|--------------------------|------------------------------|------------------------|
| Collagen scaffolds fabricated using conventional method vs Scaffolds faricated with the "magnetic particle string" method without magnetic field treatment        | 0.2646                   | 0.899995                     | insignificant          |
| Collagen scaffolds fabricated using conventional method vs Scaffolds faricated with the "magnetic particle string" method                                         | 0.5116                   | 0.899995                     | insignificant          |
| Collagen scaffolds fabricated using conventional method vs CMP functionalized GMNP scaffolds without magnetic field treatment                                     | 3.5462                   | 0.226144                     | insignificant          |
| Collagen scaffolds fabricated using conventional method vs Scaffolds Fabricated with the "magnetic anchor" method                                                 | 2.4347                   | 0.496392                     | insignificant          |
| Scaffolds faricated with the "magnetic particle string" method without magnetic field treatment vs Scaffolds faricated with the "magnetic particle string" method | 0.247                    | 0.899995                     | insignificant          |
| Scaffolds faricated with the "magnetic particle string" method without magnetic field treatment vs CMP functionalized GMNP scaffolds without                      | 3.8109                   | 0.186019                     | insignificant          |



|                                                                                                                                                           |        |          |               |
|-----------------------------------------------------------------------------------------------------------------------------------------------------------|--------|----------|---------------|
| magnetic field treatment                                                                                                                                  |        |          |               |
| Scaffolds faricated with the "magnetic particle string" method without magnetic field treatment vs Scaffolds Fabricated with the "magnetic anchor" method | 2.6994 | 0.417046 | insignificant |
| Scaffolds faricated with the "magnetic particle string" method vs CMP functionalized GMNP scaffolds without magnetic field treatment                      | 4.0579 | 0.155185 | insignificant |
| Scaffolds faricated with the "magnetic particle string" method vs Scaffolds Fabricated with the "magnetic anchor" method                                  | 2.9464 | 0.350081 | insignificant |
| CMP functionalized GMNP scaffolds without magnetic field treatment vs Scaffolds Fabricated with the "magnetic anchor" method                              | 1.1115 | 0.899995 | insignificant |
